# Supplementary material for: Biopolymer-enriched B. subtilis NCIB 3610 biofilms exhibit increased erosion resistance
Source: Royal Society of Chemistry journal article supplement (doi:10.1039/c9bm00927b), 2019-01-01
Supplement: c9bm00927b1.pdf [file c9bm00927b1.pdf]

## **Supplementary Information for**

# **Biopolymer-enriched *B. subtilis* NCIB 3610 biofilms exhibit increased erosion resistance**

Elif N. Hayta and Oliver Lieleg<sup>#</sup>

Munich School of Bioengineering and Department of Mechanical Engineering,  
Technical University of Munich, 85748 Garching, Germany

<sup>#</sup> Corresponding author:

Prof. Dr. Oliver Lieleg

Department of Mechanical Engineering and Munich School of Bioengineering,  
Technical University of Munich,

Boltzmannstraße 11, 85748 Garching, Germany

e-mail: [oliver.lieleg@tum.de](mailto:oliver.lieleg@tum.de),

phone: +49 89 289 10952, fax: + 49 89 289 10801

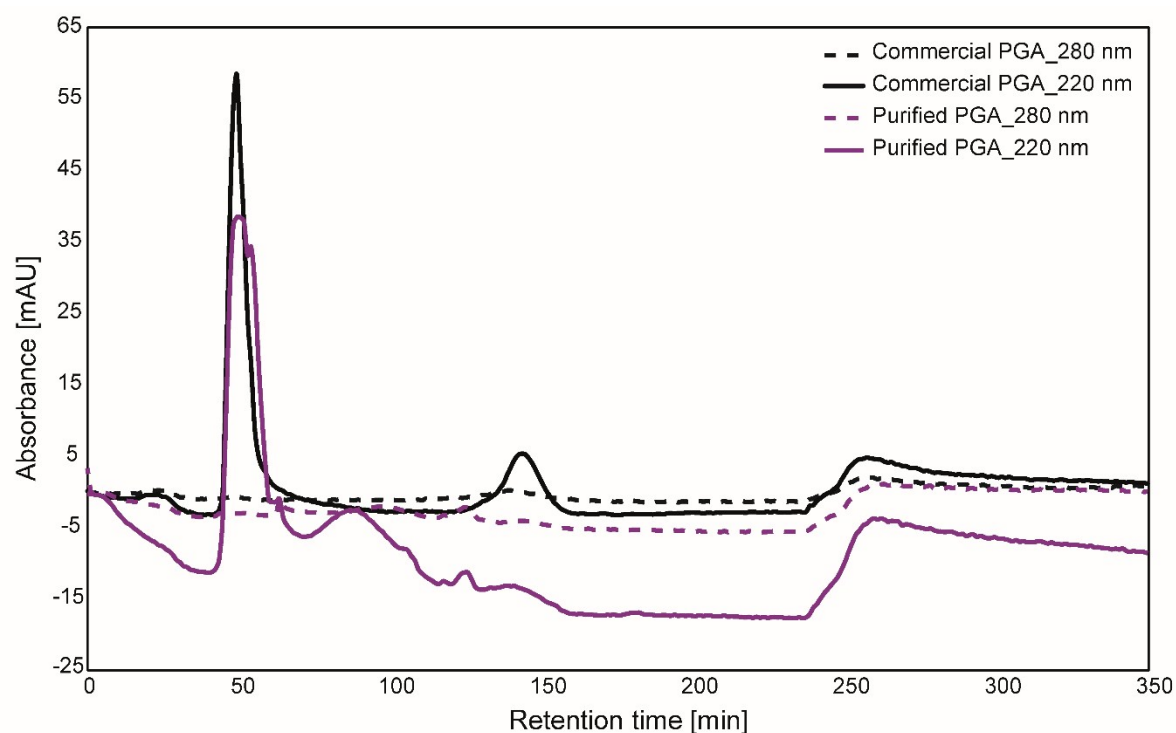

**Figure S1. Gel filtration chromatograms of commercial and in-lab purified PGA.** The same amount of a commercial or purified PGA solution (concentration 0.05% (w/v)) was run through a Sepharose 6FF XK50/100 column, and the absorbance at 220 nm and 280 nm was compared. Both PGA variants give a strong peak at 220 nm and at the same retention time. Moreover, neither sample exhibits significant absorption at 280 nm, which shows that the purity of both samples is comparable.

| Biofilm   | Initial CA                                                                          | Advancing CA                                                                        | Receding CA                                                                          | CA Hysteresis [°] |
|-----------|-------------------------------------------------------------------------------------|-------------------------------------------------------------------------------------|--------------------------------------------------------------------------------------|-------------------|
| NCIB 3610 | 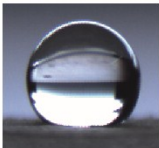   |    |    | 41                |
| Dilution  |    |    |    | 46                |
| PGA       |    |    |    | 22                |
| Alginate  |    |    |    | 21                |
| PEG 10000 |   |   |   | 16                |
| PEG 600   |  |  |  | 16                |
| B-1       |  |  |  | 2                 |

**Figure S2. Exemplary images of water droplets on biofilm samples as used for the determination of contact angles.** Initial (5  $\mu$ L), advancing (10  $\mu$ L) and receding (5  $\mu$ L) contact angle images of water droplets on each biofilm colony were acquired, and the contact angle hysteresis was calculated by subtracting the receding contact angle from the advancing contact angle.

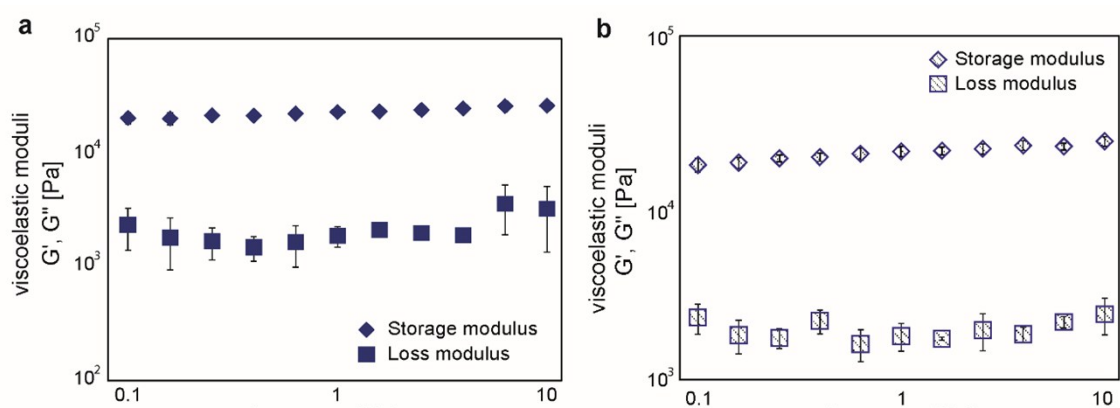

**Figure S3. Viscoelastic properties of different *B. subtilis* biofilms.** Frequency spectra showing the storage ( $G'$ ) and loss ( $G''$ ) moduli of **a)** standard, **b)** diluted, as well as **c)** PGA-, **d)** alginate-, **e)** PEG 10000-, or **f)** PEG 600-enriched NCIB 3610 and **g)** B-1 biofilms. The error bars denote the standard deviation as obtained from  $n = 5$  independent samples which were generated from  $N = 3$  different growth batches.

**NCIB 3610**

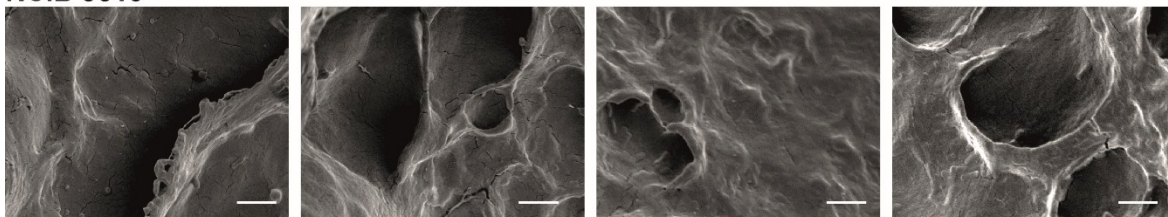

**PGA**

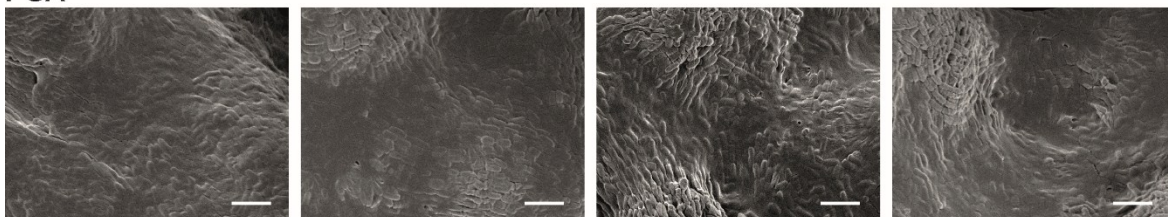

**Alginate**

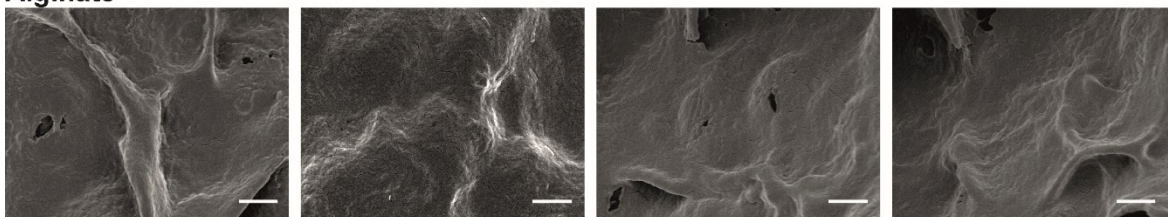

**PEG 10000**

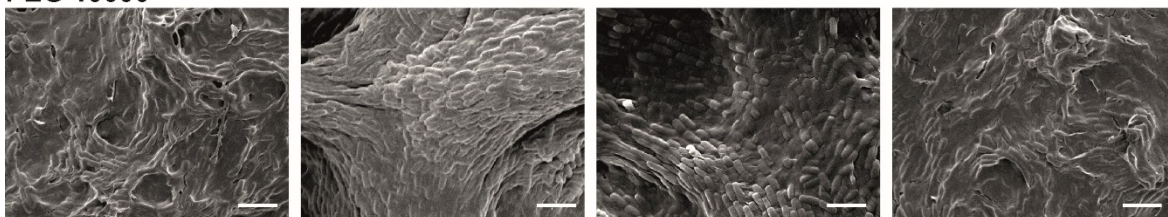

**PEG 600**

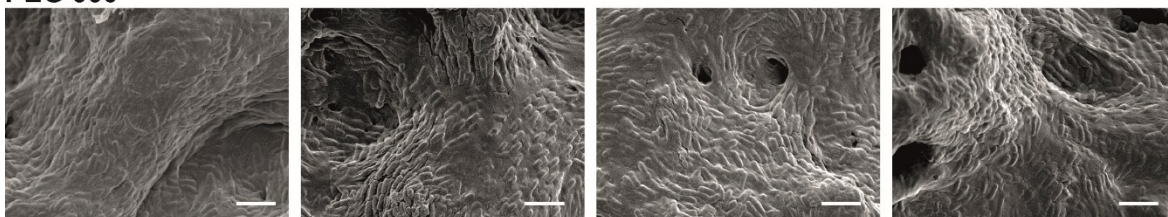

**B-1**

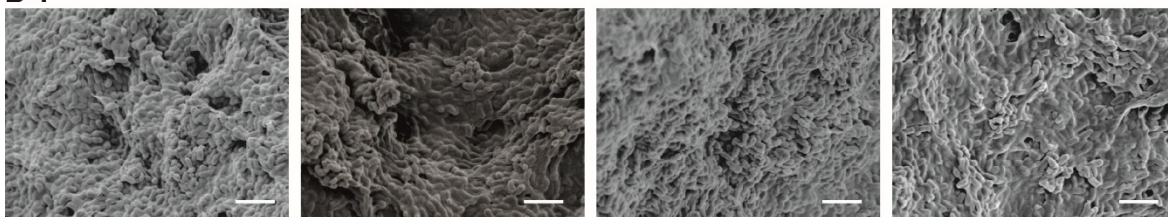

**Figure S4. SEM images of obtained from the surface of different *B. subtilis* biofilm variants.** All images shown were acquired at 3500x magnification; the scale bars represent 5  $\mu\text{m}$ . “PGA”, “Alginate”, “PEG 600” and “PEG 10000” labels refer to NCIB 3610 biofilms enriched with these



(bio)polymers.

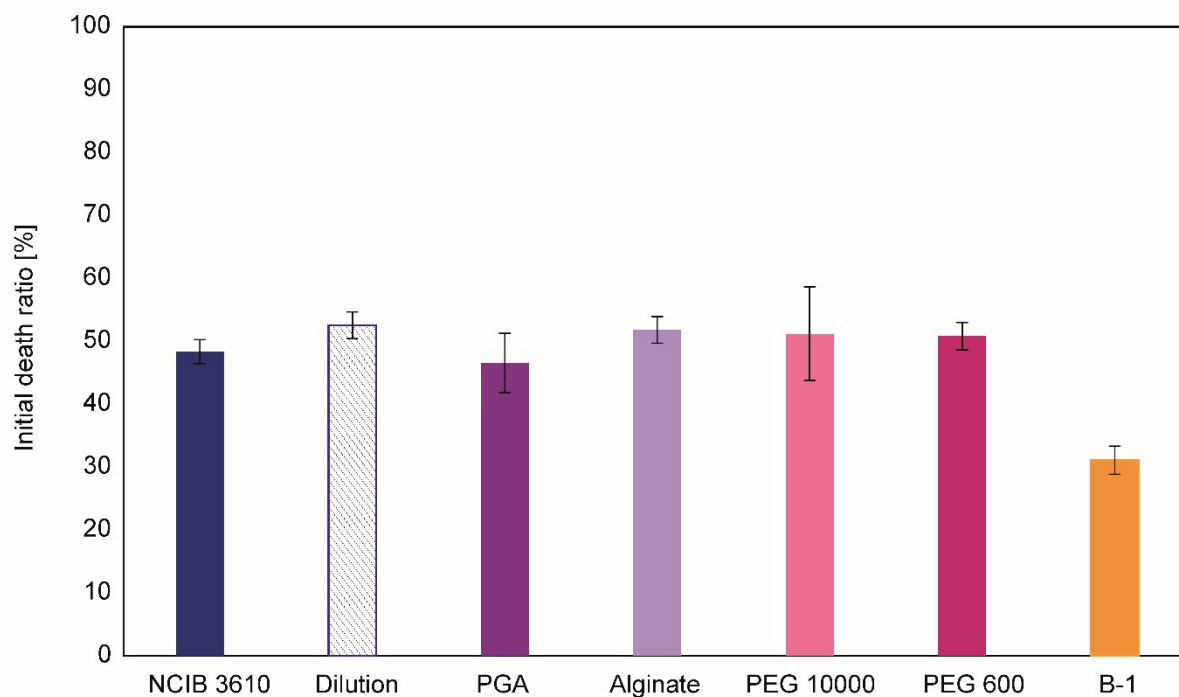

**Figure S5. Fraction of dead biofilm cells before antibiotic treatment.** The viability of the bacterial cells was tested by a two-color staining method using a LIVE/DEAD BacLight viability kit (see main paper for details). “PGA”, “Alginate”, “PEG 600” and “PEG 10000” labels refer to NCIB 3610 biofilms enriched with these (bio)polymers. The buffer-diluted NCIB 3610 sample is labelled as “Dilution”. The error bars denote the standard deviation as obtained from  $n = 9$  independent samples, created from  $N = 3$  distinct growth batches each.
